1           **EMBRYONIC DEVELOPMENT OF THE FIRE-EYE-TETRA**  
2           ***Moenkhausia oligolepis* (CHARACIFORMES: CHARACIDAE)**

3

4           Raquel Santos dos Santos<sup>1</sup>, Jeane Rodrigues Rodrigues<sup>1</sup> Jhennifer Gomes Cordeiro<sup>1</sup>,  
5           Hadda Tercya<sup>1</sup>, Marissol Leite<sup>1</sup>, Bruna Patrícia Dutra Costa<sup>1,2</sup>, Raphael da Silva  
6           Costa<sup>3</sup>, Caio Maximino<sup>1, 2</sup>, Diógenes Henrique de Siqueira-Silva<sup>1,2\*</sup>.

7           <sup>1</sup>Research Group of Studies on the Reproduction of Amazon fish (GERPA/LANEC), Faculdade de Biologia  
8           (FACBIO), University of South and Southern of Pará (Unifesspa), Marabá, Pará, Brazil; <sup>2</sup>PPG in  
9           Biodiversity and Biotechnology (BIONORTE); <sup>3</sup>Laboratory of fish Biotechnology, National Center for  
10          Research and Conservation of Continental Fish, Chico Mendes Institute of Biodiversity Conservation,  
11          São Paulo, Brazil. \* Correspondence: [diognessilva@unifesspa.edu.br](mailto:diognessilva@unifesspa.edu.br). Tel (+55) - 94981135614

12          **Running headline:** Embryonic development in Moenkhausia.

13

14          **Abstract**

15          This study describes the embryonic development of *Moenkhausia oligolepis* in captive  
16          conditions. After fertilization, the embryos were collected every 10 min up to 2 h, every  
17          20 min up to 4 h, and every 30 min until hatching. The fertilized eggs of *M. oligolepis*  
18          measured approximately  $0.85 \pm 0.5$  mm and have an adhesive surface. The embryonic  
19          development lasted 14 hours at 25°C, with the Zygote, Cleavage, Blastula, Gastrula,  
20          Neurula and Segmentation phases. The hatching occurred in embryos around the 30-  
21          somites stage. Our results bring only the second description of embryonic development  
22          to a species of Moenkhausia genus, the first for the refereed species. Such data are of  
23          paramount importance considering the current conflicting state of this genus  
24          phylogenetic classification and may help taxonomic studies. Understand the biology of  
25          a species that is easily handling in captive conditions and has an ornamental appeal may  
26          assist studies in its reproduction in order to both, supply the aquarium market and help  
27          the species conservation in nature. Moreover, our data enable the *M. oligolepis* to be  
28          used as a model species in biotechnological applications, such germ cell transplantation  
29          approach.

30

31          Keywords: Embryogenesis, Incubation, Morphology, Neotropical fish, Temperature.

## 32 1 INTRODUCTION

33 The study of embryological development is an important tool that allows the  
34 knowledge of a species life history (De Alexandre et al., 2009). This phase of  
35 development comprises fish formation events, from fertilization of the oocyte by  
36 spermatozoa to larval hatching (Solnica-Krezel, 2005). At this phase, the animal is more  
37 vulnerable to any environmental disturbance, which can change its morphology, cause  
38 deformities, or even the death. Therefore, in order to investigate the effects of changes  
39 in climatic variables on the embryonic development of teleosts, many studies describe  
40 this phase and associate its development with abiotic factors, such as temperature  
41 (Hansen and Peterson, 2001; Rodrigues-Galdino et al., 2010; Arashiro et al., 2018),  
42 water acidification (Villanueva et al., 2011), water dissolved O<sub>2</sub> (Keckeis et al., 1996),  
43 among others.

44 Studies on embryonic development are also important to subsidize research on  
45 phylogeny and taxonomy of species, allowing the knowledge of evolutionary history  
46 and relations (Godinho and Lamas, 2009; Weber et al., 2012; Dos Santos et al., 2016).  
47 In addition, Godinho and Lamas (2009) showed that the characteristics of eggs, when  
48 fertilized, help in the knowledge of reproductive strategies of teleosts.

49 In Brazil, studies on embryology focus, mainly, on species in which a  
50 commercial value is already established, such as the Siluriformes *Pseudoplatystoma*  
51 *coruscans* (Cardoso et al., 1995; Marques et al., 2008), and the Characiformes  
52 *Colossoma macropomum* (Leite et al., 2013), *Brycon insignis* (Isaú et al., 2011), and  
53 *Brycon cephalus* (Romagosa et al., 2001; De Alexandre et al., 2009), among many other  
54 large sized animals. However, considering the abundance of described species,  
55 especially of freshwater fish (3,148 species described until 2018 - ICMBIO, 2018),  
56 those works evidently do not contemplate the diversity of species.

57 The genus *Moenkhausia* (Eigenmann, 1903), for example, covers about 90  
58 species of freshwater fish distributed in South America: Venezuela, Guyana, Amazonia  
59 (Froese and Pauly, 2018), and all Brazilian watersheds (Lima and Toledo-Piza, 2001).  
60 This genus belongs to the Characiformes order and it is currently allocated as *Incertae*  
61 *sedis* in Characidae family, due to the lack of detailed research about its phylogeny.  
62 Although some taxonomic studies have already been carried out (Hojo et al., 2004;  
63 Benine et al., 2007 and 2009; Carvalho et al., 2014), the current situation about its

64 classification is still unclear, since most studies are limited to the description of species  
65 of the genus.

66 This is the case of the species *Moenkhausia oligolepis* (Gunther, 1864), which is  
67 currently undergoing discussions about its classification due to the wide distribution of  
68 *Moenkhausia* species, coexisting and exhibiting similarities of colors and patterns. For  
69 this reason, Costa (1994) and Benine (2009) propose *M. oligolepis* as a complex of  
70 species. However, according to Domingos et al., (2014), the coexistence and similarity  
71 between species usually results in an incorrect definition of their conservation status.  
72 Called in some areas as black tail tetra (Matos et al., 2003), this species achieves around  
73 10 cm of total length, when mature (Froese and Pauly, 2018). Present a reticulated body  
74 color, reddish pigmentation on the dorsal margin of the eye, giving it popular name  
75 (fire-eye-tetra), and a dark spot on the stalks of the caudal fin.

76 Thus, in order to contribute to the knowledge about the biology and conservation  
77 of the species, besides helping to identify and classify it, this study aimed to describe  
78 the embryonic development of *M. oligolepis* under captive conditions. The study  
79 describes the timing of usual stages after fertilization, based on external morphology, in  
80 captive individuals of *M. oligolepis*. It was found that the embryonic development  
81 lasted 14 hours at 25°C, with staging occurring at similar times as that of closely related  
82 species (e.g., *Brycon gouldingi*: Faustino et al., 2011; *Astyanax bimaculatus*: Weber et  
83 al., 2012; *Astyanax altiparanae*: Dos Santos et al., 2016).

84

85

## 86 **2 MATERIAL AND METHODOS**

### 87 *Sampling of animals*

88 The sexually mature individuals of *M. oligolepis* were collected in streams in the  
89 Tocantins Basin, located in the interior of the Amazon Forest, in the “Fundação  
90 Zoobotânica de Marabá” - PA (collection authorization ICMBio nº 62027-1). Nets (1.10  
91 mm nylon, 4.75 x 1 mesh, 10 cm) were used to sample the fish, which were transported  
92 in 30-liter-plastic bags filled with water and equipped with portable aerator, to the  
93 laboratory. The species was identified in the Laboratory of Biology and Fish Genetics  
94 of the Institute of Biosciences of the Universidade Estadual Paulista (UNESP),  
95 Botucatu, state of São Paulo, Brazil (voucher: 25622).

96 Fish acclimatization lasted four months in glass tanks (23 x 21 cm, capacity of  
97 13 liters of water) with aeration pumps and internal bacteriological filter. The animals  
98 were fed three times a day with commercial feed (4200 Kcal·kg<sup>-1</sup> and 28% crude  
99 protein) and the tank water was partially exchanged daily.

100

### 101 *Preparation of matrices*

102 Four males and three females were separated in a tank that had the same  
103 dimensions of the acclimatization ones, with constant circulation of water. Those  
104 animals were submitted to a monitored photoperiod cycle of 12 hours of light/dark, for  
105 45 days. During this period, the water parameters (dissolved ammonia, nitrite, dissolved  
106 O<sub>2</sub>, pH and temperature) were analyzed every day. The same commercial feed was  
107 offered throughout the day in three plots of 0.100 g each, totaling 0.300 g of feed a day.

108

### 109 *Induction to spawning and fertilization*

110 At the 45<sup>th</sup> day, animals were injected with the pituitary crude extract of carp  
111 macerated and diluted in 0.9% saline solution. The solution was applied in the coelomic  
112 cavity at the base of the pectoral fin using an insulin syringe (1 ml) with a needle.  
113 Before this procedure, the animals were anesthetized with 1 ml of Eugenol solution (20  
114 ml of Biodynamic Eugenol in 100 ml of Absolute Alcohol) diluted in 500 ml of water.  
115 This step was based on the protocol of Ninhaus-Silveira et al. (2006), in which females  
116 received two hormonal doses: the first doses of 0.5 mg / kg body weight and, after a 12-

117 hour interval, the second doses of 5.0 mg / kg body weight. Males received a single  
118 dose of 1.0 mg / kg body weight at the same time as the second dose of females.

119

### 120 ***Embryo collection and analyses***

121 Samples were collected at the following time intervals after fertilization: every  
122 10 min up to 2 hours per fertilization (hpf); every 20 min up to 4 hpf: and every 30 min  
123 until hatching. The sampled embryos were fixated in a solution of 2.5% glutaraldehyde  
124 sodium phosphate buffer 0.1 M, pH 7.3, and were observed using a trinocular  
125 stereoscope (TNE-10TN Opton). The images were captured using the TC Capture  
126 program and a digital camera (Samsung A3 2015(8mp)) and processed by the  
127 CorelDRAW program (version 2018).

128 The embryonic development of *M. oligolepis* was classified in the standard  
129 phases (zygote, cleavage, blastula, gastrula, segmentation and hatching), based on  
130 previous studies Arashiro et al. (2018). The temperature and parameters of the water  
131 were monitored and documented during the development of the embryos.

132

133

### 134 **3 RESULTS**

#### 135 *Egg sampling*

136 The spawning occurred semi-naturally, two hours after the application of the last  
137 hormonal doses.

138

#### 139 *Egg morphology*

140 The fertilized eggs of *M. oligolepis* measure  $0.85 \pm 0.5$  mm (mean $\pm$ SD) in  
141 diameter. They are demersal, spherical and translucent after fertilization, and do not  
142 present oil drop. The chorion has an adhesive surface, and the perivitelline spaces  
143 measure  $0.1 \pm 0.02$  mm (mean $\pm$ SD) (Fig. 1).

144

#### 145 *Embryogenesis*

146 Phases, stages and time of the development of *M. oligolepis* embryogenesis is listed on  
147 Table 1.

148

#### 149 *Zygote phase*

150 It was observed an increase of the perivitelline space, and the formation of the  
151 blastodisc defining the animal and vegetal poles and evidencing a great quantity of yolk  
152 (Fig. 2A).

153

#### 154 *Cleavage phase*

155 Cleavage followed the pattern of discoidal meroblastic division, being observed  
156 the presence of 2, 4, 8, 16, 32 and 64 consecutive blastomers (Fig. 2B-G). This phase  
157 took approximately 30 minutes.

158

159 *Blastula phase*

160 This phase was initiated at the sixth cleavage, doubling the number of cells in  
161 the sequences of 128, 256, and 512 blastomeres achieved at 1 h 30 min after fertilization  
162 (AF). The dome phase was reached at 1 h 40 min AF characterized by the organization  
163 of thousands of blastomeres in several layers at the top of the yolk, presenting a similar  
164 appearance to a mulberry (Fig. 2H-K).

165

166 *Gastrula phase*

167 This phase began around 2 h AF. The cells of blastoderm started the epiboly  
168 movement, moving toward the yolk and gradually evolving. At 2 h 40 min, a  
169 germinative ring was observed (Fig. 2L), and at 4 h AF 90% of the yolk was surrounded  
170 by the blastula and the blastopore was observed (fig. 2L-R).

171

172 *Neurula*

173 This stage occurred at 5 h and 30 min AF characterized mainly by epiboly of  
174 100% of the embryo, whose blastoderm completely involves the yolk through epiboly  
175 (Fig. 3A).

176

177 *Segmentation*

178 The segmentation phase is the last phase of embryonic development, and  
179 represents the differentiation of the cephalic and caudal poles, and the appearance of  
180 somites, vesicles and some external and internal organs of the embryo, extending until  
181 the moment of hatching. Segmentation lasted about 8 h 50 min. The embryo presented  
182 the first somite around 5 h 50 min AF, eight somites at 6 h30 min, and at 7 h30 min it  
183 was possible to visualize the optical vesicle. At 7 h40 min AF there were 17 somites, 8  
184 h 10 min AF the appearance of the Kupffer vesicle was observed, followed by the

185 appearance of the otic vesicle at 9 h AF. At 11 h 30 min AF, there were 27 somites, and  
186 after that, just before hatching, about 30 somites (Fig. 3B-F).

187

188 *Hatching phase*

189 The embryo presented free tail at 12 h 30 min AF, followed by larvae hatching  
190 at 14 h AF, with about 30 somites (Fig. 3F).

191

## 192 **4 DISCUSSION**

193

194 In this study we described the embryonic development of *M. oligolepis*, a  
195 Characidae of disputed taxonomic position from the Amazon, up to hatching. We found  
196 that the embryonic development lasted 14 hours at 25°C, with staging occurring at  
197 similar times as that of closely related species.

198 The ontogenetic development in fish is sensitive to changes in temperature, since  
199 its metabolic activities can be accelerated or retarded, altering the rhythm of the  
200 embryonic development (Santos et al., 2006; Faustino et al., 2010). This period is  
201 variable among species, and may be short as observed in *M. oligolepis*, or even shorter,  
202 as in *M. sanctaefilomenae*, whose embryonic development lasted 13 h (Walter, 2011).  
203 On the other hand, *Prochilodus lineatus* at higher temperatures (28°C) presented  
204 embryo development time similar to that of the present study (Ninhaus-Silveira et al.,  
205 2006), which makes clear that each species has its own relation with abiotic factors, a  
206 strategy that reflects the life history of each species.

207 The diameter of eggs is also directly related to the reproductive strategy, since  
208 small eggs are usually found in migratory species of total spawning and the largest in  
209 non-migratory species (Godinho et al., 2010). The diameter of *M. oligolepis* eggs is  
210 similar to those observed by Sato et al., (2006) and Webber et al., (2012) in other small  
211 Characiformes, *Astyanax bimaculatus* and *Tetragonopterus chalceus*, respectively, both  
212 reofilic species. *Astyanax bimaculatus* also reproduces in lentic waters (Webber et al.,  
213 2012).

214 It was also observed that the eggs of *M. oligolepis* show characteristics of  
215 adhesiveness. According to Kolm and Ahnesjö (2005), adhesive eggs are a



216 characteristic of the species with partial spawning and parental care. Godinho et al.,  
217 (2010) also observed higher adhesiveness in eggs of lentic species with multiple  
218 spawning, whereas lotic species presented free eggs and total spawning. Judging from  
219 the characteristics of the environment in which the matrices of this study were collected,  
220 we can suggest that *M. oligolepis* is a species that spawns in lentic waters; however,  
221 differently from other species with adhesive eggs, there is no evidence of parental care  
222 in this *M. oligolepis*.

223         The adhesion of the eggs to the substrate contributes to the viability and  
224 protection of the offspring in the natural environment, but in captivity it may cause great  
225 mortality of the embryos, since the eggs and embryos agglomerate impairing the gas  
226 exchange between the developing embryo and the external environment. Moreover, egg  
227 adhesion can contribute to the proliferation of fungi and bacteria, causing death or  
228 malformation in the embryos. Many techniques have been developed to mitigate such  
229 damages (Siddique et al., 2014), such as incubators equipped with a closed water  
230 recirculation system, which promote the circulation of water and embryos, preventing  
231 their deposit and agglomeration in the tank bottom (Luz et al., 2001). In the studied  
232 species, however, it was observed that, although the eggs presented strong adhesiveness  
233 forming clusters of embryos, fixed to each other, or to the walls of the aquarium, the  
234 aerator was sufficient to keep them suspended in the water, dispensing the use of more  
235 elaborate techniques.

236         Another important structure in the embryological staging of fish is the chorion,  
237 since with the hydration of the egg it expands to form the perivitelline space (Siddique  
238 et al., 2014), which will aid in the development of the embryo, protecting it from  
239 external injuries often caused by the water flow. Due to this, eggs with large  
240 perivitelline space are characteristic of species that reproduce in agitated waters,  
241 whereas, smaller spaces are present in eggs of species that spawn in calm waters, an  
242 aspect that reflects different adaptations of the species to the environment they live  
243 (Yamagami et al., 1992; De Alexandre et al., 2009; Ribeiro et al., 2012; Yang et al.,  
244 2014). Similar to other Characiformes, such as *Acestrorhynchus spp.*, *Hoplias lacerdae*,  
245 *Prochilodus spp.*, *Leporinus sp.* observed by Rizzo et al., (2002), *M. oligolepis* presents  
246 pelagic eggs.

247           Considering that this is only the second embryological study of the genus  
248 *Moenkhausia*, this work brings important data about the embryology of *M. oligolepis*.  
249 We note that although much information has been revealed and supported, some of  
250 them need more detailed and elaborate assessments and we encourage the use of such  
251 data to clarify the confusing picture in species and genus classification. As suggested by  
252 Webber et al., (2012), studies like this are important to support future studies on  
253 reproduction, phylogeny and taxonomy.

254

### 255 **Acknowledgments**

256           We thank the Laboratory of Neurosciences and Behavior "Frederico Guilherme  
257 Graeff" (LaNec) for the structure used. The authors also thank the prof. Claudio de  
258 Oliveira from the Laboratory of Biology and Fish Genetics of the Institute of  
259 Biosciences of the State University of São Paulo (UNESP), for the identification of fish.  
260 To the Laboratory of Science and Technology of Madeira (UEPA) in the person of prof.  
261 Luiz Eduardo de Lima Melo, for facilities support. To all the students of the Research  
262 Group of Studies in Reproduction of Amazonian Fish (GERPA) and to the Fundação  
263 Zoobotânica of Marabá - PA for allowing the collection of fish in its facilities.

264

### 265 **Financial Support**

266 This work was funded by “Conselho Nacional de Desenvolvimento Científico e  
267 Tecnológico” CNPq, which awarded a PIBIC grant (PIBIC-2017660905051).

268

### 269 **Conflict of interest**

270 The authors declare that they have no conflict of interest.

271

### 272 **Ethical standards**

273 The authors assert that all procedures contributing to this work comply with the ethical  
274 standards of the relevant national and institutional guides on the care and use of  
275 laboratory animals.

276 **References**

- 277 Arashiro, DR, Yasui, GS, Calado, LL, Nascimento, NFD, Santos, MPD, Alves do  
278 Santos, SC, and Senhorini, JA (2018) Synchronizing developmental stages in  
279 Neotropical catfishes for application in germ cell transplantation. *Zygote*, 135-148  
280 pp.
- 281 Benine, RC, Castro, R, Santos and ACA (2007) A new *Moenkhausia eigenmanni*, 1903  
282 (Ostariophysi: characiformes) from chapada diamantina, rio Paraguacu basin, Bahia,  
283 northeastern Brazil. *Neotropical Ichthyology* 5, 259-262.
- 284 Benine, RC, Mariguela, TC, and Oliveira, C (2009) New species of *Moenkhausia*  
285 *Eigenmanni*, 1903 (Characiformes: Characidae) with comments on the *Moenkhausia*  
286 *oligolepis* species complex. *Neotropical Ichthyology* 7, 161-168.
- 287 Cardoso, EL, Alves, MS, Ferreira, RM, and Godinho, HP (1995) Embryogenesis of the  
288 neotropical freshwater Siluriforme *Pseudoplatystoma coruscans*. *Aquatic Living*  
289 *Resources* 8, 343-346.
- 290 Carvalho, FR, Sarmento-Soares, LM, and Martins-Pinheiro, RF (2014) Redescription of  
291 *Moenkhausia doceana* (Steindachner, 1877) (Ostariophysi: Characiformes): a  
292 characid from the Northeastern Mata Atlântica ecoregion, Brazil. *Neotropical*  
293 *Ichthyology* 12, 377-388.
- 294 Costa, WJEM. (1994) Description of two new species of the genus *Moenkhausia*  
295 (Characiformes: Characidae) from the central Brazil. *Zoologischer Anzeiger* 232, 21-  
296 29.
- 297 De Alexandre, JS, Ninhaus-Silveira, A, Veríssimo-Silveira, R, Buzollo, H, Senhorini,  
298 JA, and Chaguri, MP (2009) Structural analysis of the embryonic development in  
299 *Brycon cephalus* (Gunther, 1869). *Zygote*, 173-183 pp.
- 300 Domingos, TJ, Moraes, LN, Moresco, RM, Margarido, VP, and Venere, PC (2014)  
301 Genetic and morphological diversity of *Moenkhausia oligolepis* (Characiformes:  
302 Characidae) populations in the tributaries of the Araguaia River, Brazil: implications  
303 for taxonomy and conservation. *Genetics and Molecular Research* 13, 7979-7991.
- 304 Dos Santos, MP, Yasui, GS, Xavier, PLP, de Macedo Adamov, NS, do Nascimento,  
305 NF, Fujimoto, T, and Nakaghi, LSO (2016) Morphology of gametes, post-  
306 fertilization events and the effect of temperature on the embryonic development of  
307 *Astyanax altiparanae* (Teleostei, Characidae). *Zygote* 24, 795-807.

- 308 Faustino, F, Nakaghi, LSO, and Neumann, E (2010) *Brycon gouldingi* (Teleostei,  
309 Characidae): aspects of the embryonic development in a new fish species with  
310 aquaculture potential. *Zygote* 19, 351-363.
- 311 Froese R, and Pauly, D (2018). *Moenkausia oligolepis* (Gunther, 1864) Glass tetra.  
312 **World Wide Web electronic publication.** FishBase. Disponivel em:  
313 <<https://www.fishbase.se/Summary/SpeciesSummary.php?id=12391&lang=portuguese>  
314 se> Access em: 07 Agu 2020.
- 315 Godinho, AL, Lamas, IR and Godinho, HP (2009) Reproductive ecology of Brazilian  
316 freshwater fishes. *Environmental Biology of Fishes* 87, 143-162.
- 317 Hansen, TK, and Falk-Petersen, IB (2001) The influence of rearing temperature on early  
318 development and growth of spotted wolffish *Anarhichas minor* (Olafsen).  
319 *Aquaculture research* 32, 369-378.
- 320 Hojo, RES, Santos, GB and Bazzoli, N (2004) Reproductive biology of *Moenkhausia*  
321 *intermedia* (Eigenmann) (Pisces, Characiformes) in Itumbiara Reservoir, Goiás,  
322 Brazil. *Revista Brasileira de Zoologia* 21, 519-524.
- 323 ICMBio, 2016. Instituto Chico Mendes de Conservação da Biodiversidade. Executive  
324 Summary. Brazil Red Book of Threatened Species of Fauna. [http://www.icmbio.gov.br/portal/images/stories/comunicacao/publicacoes/publicacoes-diversas/dcom\\_sumario\\_executivo\\_livro\\_vermelho\\_ed\\_2016.pdf](http://www.icmbio.gov.br/portal/images/stories/comunicacao/publicacoes/publicacoes-diversas/dcom_sumario_executivo_livro_vermelho_ed_2016.pdf).  
325  
326
- 327 Isaú, ZA, Rizzo, E, Amaral, TB, Mourad, NM, and Viveiros, AT (2011) Structural  
328 analysis of oocytes, post-fertilization events and embryonic development of the  
329 Brazilian endangered teleost *Brycon insignis* (Characiformes). *Zygote* 21, 85-94.
- 330 Keckeis, H, Bauer-Nemeschkal, E and Kamler, E (1996) Effects of reduced oxygen  
331 level on the mortality and hatching rate of *Chondrostoma nasus* embryos. *Journal of*  
332 *Fish Biology* 49, 430-440.
- 333 Kolm, Niclas, Ahnesjö, Ingrid (2005) Do egg size and parental care coevolve in fishes?  
334 *Journal of Fish Biology* 66, 1499-1515.
- 335 Leite, LV, Melo, MAP, Oliveira, FCE, Pinheiro, JPS, Campello, CC, Nunes, JF, and  
336 Salmito-Vanderley, CSB (2013) Determinação da dose inseminante e embriogênese  
337 na fertilização artificial de tambaqui (*Colossoma macropomum*). *Arquivo Brasileiro*  
338 *de Medicina Veterinária e Zootecnia* 65, 421-429.

- 339 Lima, FC, and Toledo-Piza, M (2001) New species of Moenkhausia (Characiformes:  
340 Characidae) from the rio Negro of Brazil. *Copeia* 4, 1058-1063.
- 341 Luz, RK, Reynalte-tataje, DA, Ferreira, AA, and Zaniboni-Filho, E (2001)  
342 Desenvolvimento embrionário e estágios larvais do mandi-amarelo *Pimelodus*  
343 *maculatus*. *Boletim do Instituto de Pesca* 27, 49-55.
- 344 Marques, C, Okada Nakaghi, LS, Faustino, F, Ganeco, LN, and Senhorini, JA (2008)  
345 Observation of the embryonic development in *Pseudoplatystoma coruscans*  
346 (Siluriformes: Pimelodidae) under light and scanning electron microscopy. *Zygote*,  
347 333-342 pp.
- 348 Matos, E, Matos, P, Corral, L and Azevedo, C (2003) A morfologia ultra-estrutural de  
349 microrganismos parasitas que causam microsporidioses e mixosporidioses em peixes  
350 tropicais brasileiros. *Boletim Técnico do CEPTA*, Pirassununga 16, 27-40.
- 351 Ninhaus-Silveira, A, Foresti, F, and De Azevedo, A (2006) Structural and ultrastructural  
352 analysis of embryonic development of *Prochilodus lineatus* (Valenciennes, 1836)  
353 (Characiforme; Prochilodontidae). *Zygote* 14, 217-229.
- 354 Oliveira-Almeida, IR, Buzollo, H, da Silva Costa, R, Veríssimo-Silveira, R, Porto-  
355 Foresti, F, and Ninhaus-Silveira, A (2014) Structural analysis of embryogenesis of  
356 *Leiarius marmoratus* (Siluriformes: Pimelodidae). *Zygote* 23, 742-757.
- 357 Rizzo, E, Sato, Y, Barreto, BP, and Godinho, HP (2002) Adhesiveness and surface  
358 patterns of eggs in neotropical freshwater teleosts. *Journal of Fish Biology* 61, 615-  
359 632.
- 360 Ribeiro, CS and Guimarães, MR (2012) Fatores ambientais e reprodução dos peixes.  
361 *Revista da Biologia*, [10.7594/revbio.08.10](https://doi.org/10.7594/revbio.08.10). 58-61
- 362 Rodrigues-Galdino, AM, Maiolino, CV, Forgati, M, Donatti, L, Mikos, JD, Carneiro,  
363 PCF, & Rios, FSA (2009). Development of the neotropical catfish *Rhamdia quelen*  
364 (Siluriformes, Heptapteridae) incubated in different temperature regimes. *Zygote* 18,  
365 131.
- 366 Romagosa, E, Narahara, MY, and Fenerich-Verani, N (2001) Stages of embryonic  
367 development of the “matrinxã”, *Brycon cephalus* (Pisces, Characidae). *Bol. Inst.*  
368 *Pesca* 27, 29-32.

- 369 Santos, JE, Padilha, GEV, Bomcompagni-Júnior, O, Santos, GB, Rizzo, E, and Bazzoli,  
370 N (2006) Ovarian follicle growth in the catfish *Iheringichthys labrosus* (Siluriformes:  
371 Pimelodidae). *Tissue and Cell* 38, 303-310.
- 372 Sato Y, Sampaio, EV, Fenerich-Verani, N, and Verani, JR (2006) Biologia reprodutiva  
373 e reprodução induzida de duas espécies de Characidae (Osteichthyes, Characiformes)  
374 da bacia do São Francisco, Minas Gerais, Brasil. *Revista Brasileira de Zoologia* 23,  
375 267-273.
- 376 Siddique, MAM, Psenicka, M, Cosson, J, Dzyuba, B, Rodina, M, Golpour, A, and  
377 Linhart, O (2014) Egg stickiness in artificial reproduction of sturgeon: an  
378 overview. *Reviews in Aquaculture* 8, 18-29.
- 379 Solnica-Krezel, L (2005) Conserved patterns of cell movements during vertebrate  
380 gastrulation. *Current biology* 15, R213-R228.
- 381 Villanueva, R, Quintana, D, Petroni, G, and Bozzano, A (2011) Factors influencing the  
382 embryonic development and hatchling size of the oceanic squid *Illex coindetii*  
383 following in vitro fertilization. *Journal of Experimental Marine Biology and*  
384 *Ecology* 407, 54-62.
- 385 Walter, Brian, E (2011) Early ontogeny of aquarium raised *Moenkhausia*  
386 *sanctaeofilomenae* (Characiformes: Characidae). *Ichthyological research* 59, 95-103.
- 387 Weber, AA, Arantes, FP, Sato, Y, Rizzo, E, and Bazzoli, N (2012) Oocyte adhesiveness  
388 and embryonic development of *Astyanax bimaculatus* (Linnaeus, 1758) (Pisces:  
389 Characidae). *Zygote* 21, 198.
- 390 Yamagami, K, Hamazaki, TS, Yasumasut, S, and Masuda, K (1992) Molecular and  
391 cellular basis of formation, hardening, and breakdown of the egg envelope in fish.  
392 *In International review of cytology* 136, 51-92. Academic Press.
- 393 Yang, S, Zhang, X, Liu, X, Hu, J, Wang, Y, Du, Z, and Yan, T (2014) Chorion surface  
394 ultrastructure of loach *Misgurnus anguillicaudatus*: adaptation to the environment  
395 and correlation with the reproductive strategy. *Journal of Natural History* 48, 35-36.

Co

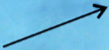

EsP

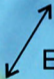

BI

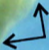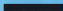

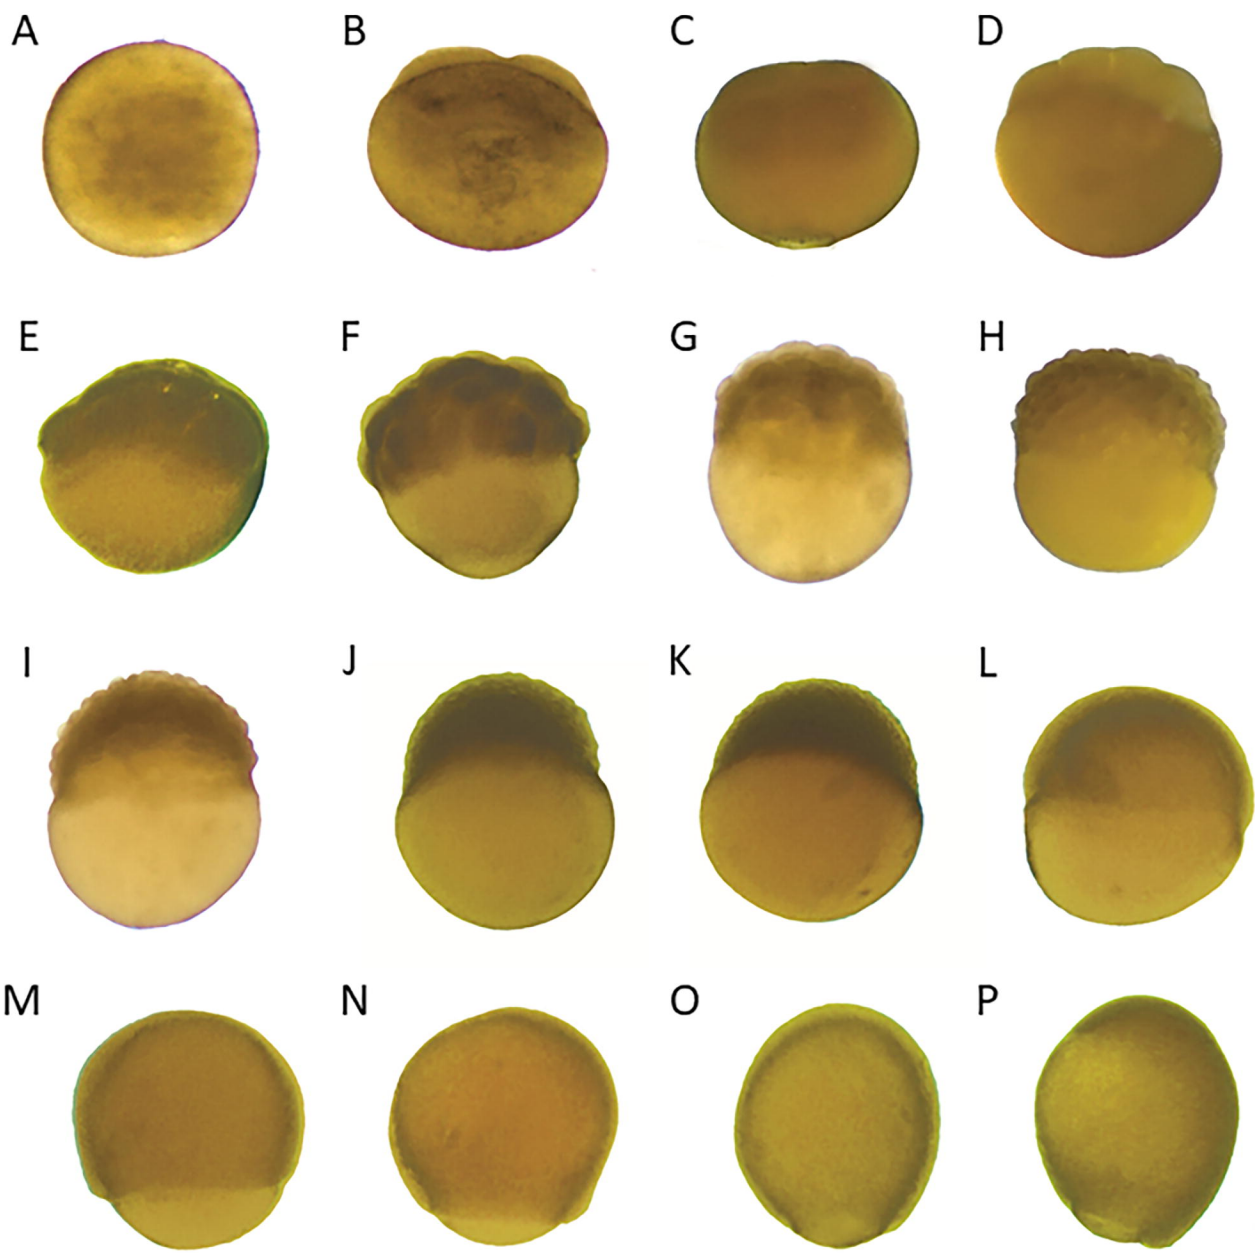



**A**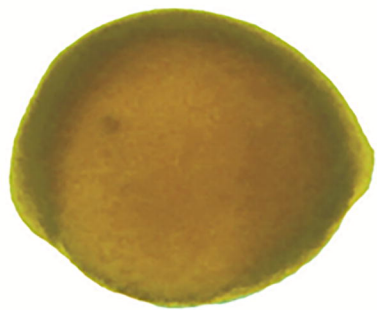**B**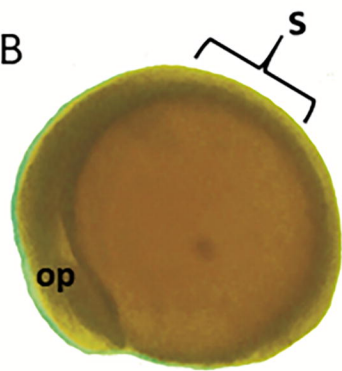**C**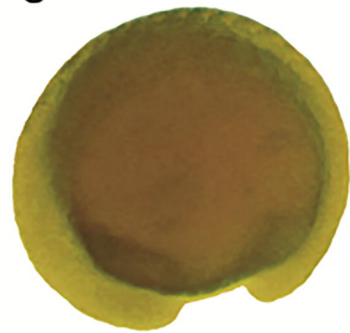**D**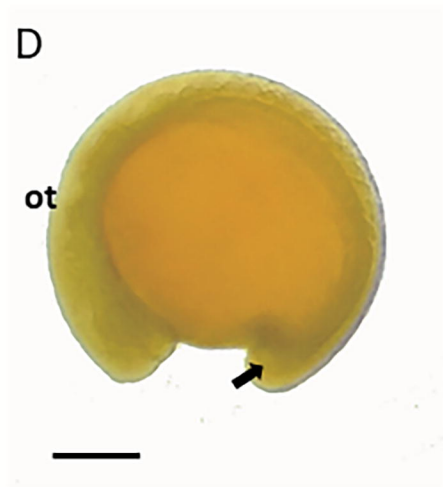**E**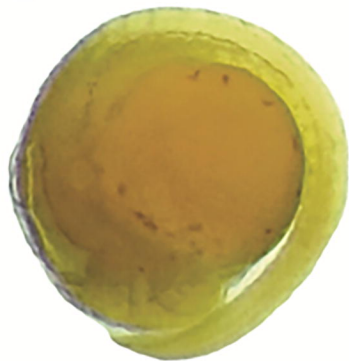**F**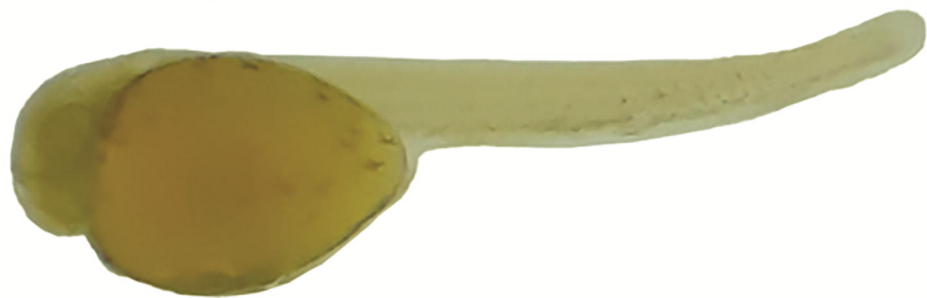

**Table 1.** Phases and time of embryonic development in *M. oligolepis* at the temperature of 25°C.

| <b>Phase</b> | <b>Stage</b>    | <b>Time (h)</b> | <b>Fig.</b> |
|--------------|-----------------|-----------------|-------------|
| Zygote       |                 | 0.12            | 1A          |
| Cleavage     | 2 cell          | 0.20            | 1B          |
|              | 4 cell          | 0.25            | 1C          |
|              | 8 cell          | 0.30            | 1D          |
|              | 16 cell         | 0.35            | 1E          |
|              | 32 cell         | 0.45            | 1F          |
|              | 64 cell         | 0.55            | 1G          |
|              | Blastula        | 128 cell        | 1:10        |
| 256 cell     |                 | 1:20            | 1I          |
| 512 cell     |                 | 1:30            | 1J          |
| Dome         |                 | 1:40            | 1K          |
| Gastrula     | 50% epiboly     | 2:00            | 1L          |
|              | 75% epiboly     | 2:40            | 1M          |
|              | 90% epiboly     | 3:30            | 1N          |
|              | 95% / epiboly   | 4:00            | 1O          |
|              | Initial neurula | 4: 20           | 1P          |
| Neurula      | 100% epiboly    | 5:30            | 2A          |
| Segmentation | 5 somites       | 5:50            | 2B          |
|              | 8 somites       | 6:30            | 2C          |
|              | 17 somites      | 9:30            | 2D          |
|              | 27 somites      | 11:30           | 2E          |
| Hatching     | 30 somites      | 14:00           | 2F          |
